# Supplementary material for: Antibacterial Activity of Manganese Dioxide Nanosheets by ROS-Mediated Pathways and Destroying Membrane Integrity
Source: PubMed Central journal article supplement (PMC7466589; doi:10.3390/nano10081545), 2020-08-07
Supplement: nanomaterials-10-01545-s001.pdf [file nanomaterials-10-01545-s001.pdf]

# Antibacterial Activity of Manganese Dioxide Nanosheets by ROS-mediated Pathways and Destroying Membrane Integrity

Ting Du <sup>1</sup>, Siya Chen <sup>1</sup>, Jinyu Zhang <sup>1</sup>, Tingting Li <sup>2</sup>, Ping Li <sup>1</sup>, Jifeng Liu <sup>1</sup>, Xinjun Du <sup>1,\*</sup> and Shuo Wang <sup>1,3,\*</sup>

<sup>1</sup> State Key Laboratory of Food Nutrition and Safety, College of Food Science and Engineering, Tianjin University of Science and Technology, Tianjin 300457, China; tingdu@tust.edu.cn (T.D.); siycmail@163.com (S.C.); jinyuzhang@mail.tust.edu.cn (J.Z.); zoelxx@tust.edu.cn (P.L.); liujifeng111@gmail.com (J.L.)

<sup>2</sup> Key Laboratory of Micro-Nano Materials for Energy Storage and Conversion of Henan Province, College of Advanced Materials and Energy, Institute of Surface Micro and Nano Materials, Xuchang University, Xuchang 461000, China; tingtingli101@xcu.edu.cn

<sup>3</sup> Tianjin Key Laboratory of Food Science and Health, School of Medicine, Nankai University, Tianjin 300071, China

\* Correspondence: xjdu@tust.edu.cn (X.D.); wangshuo@nankai.edu.cn (S.W.)

## Experimental Section

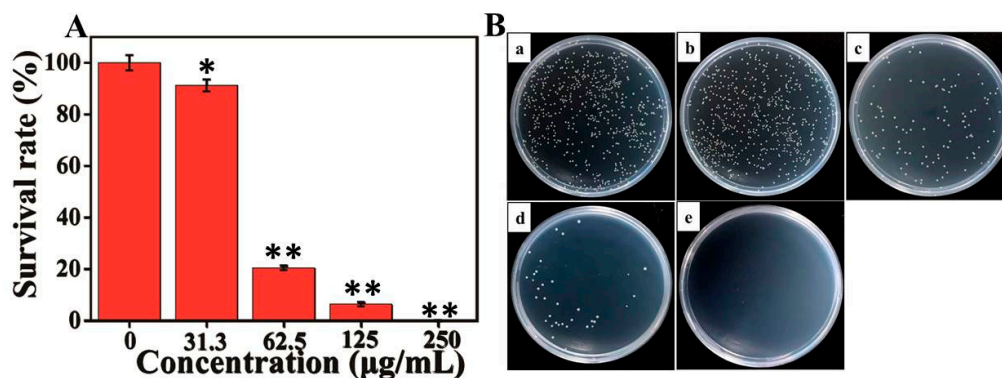

**Figure S1.** In vitro antibacterial activity test. (A) Cell survival rate of *Staphylococcus aureus* cells treated or untreated with MnO<sub>2</sub> nanosheets (31.5–250 µg/mL). (B) Photographs of the agar plates of *Staphylococcus aureus* treated or untreated with MnO<sub>2</sub> nanosheets, with a–e corresponding to the concentrations of MnO<sub>2</sub> nanosheets in Figure S1A (a–e: 0, 31.3, 62.5, 125, 250 µg/mL).
